# Supplementary material for: Adulteration of Essential Oils: A Multitask Issue for Quality Control. Three Case Studies: Lavandula angustifolia Mill., Citrus limon (L.) Osbeck and Melaleuca alternifolia (Maiden & Betche) Cheel
Source: MDPI journal article supplement (doi:10.3390/molecules26185610), 2021-09-16
Supplement: s1 [file s1]

Table S1, Genuine *Lavandula angustifolia* EO enantiomeric composition

| I'sexp | I'slit | Compound                | Percent Enantiomeric Composition |
|--------|--------|-------------------------|----------------------------------|
| 1139   | 1133   | (S)-(-)-camphor         | 9.0                              |
| 1147   | 1141   | (R)-(+)-camphor         | 91.0                             |
| 1180   | 1174   | (R)-(-)-linalool        | 93.8                             |
| 1197   | 1189   | (S)-(+)-linalool        | 6.2                              |
| 1196   | 1192   | (S)-(-)-borneol         | 17.8                             |
| 1204   | 1200   | (R)-(+)-borneol         | 82.2                             |
| 1233   | 1231   | (R)-(-)-linalyl acetate | 99.4                             |
| 1243   | 1237   | (S)-(+)-linalyl acetate | 0.6                              |
| 1444   | 1454   | (R)-(+)-germacrene D    | 9.3                              |
| 1457   | 1462   | (S)-(-)-germacrene D    | 90.7                             |

Table S2, Genuine *Citrus limon* EO enantiomeric composition

| I'sexp | I'slit | Compound                                           | Percent Enantiomeric Composition |
|--------|--------|----------------------------------------------------|----------------------------------|
| 952    | 944    | (R)-(+)- $\beta$ -pinene                           | 6.6                              |
| 961    | 955    | (S)-(-)- $\beta$ -pinene                           | 93.4                             |
| 979    | 972    | (R)-(+)-sabinene                                   | 15.5                             |
| 993    | 988    | (S)-(-)-sabinene                                   | 84.5                             |
| 1060   | 1056   | (S)-(-)-limonene                                   | 1.8                              |
| 1071   | 1072   | (R)-(+)-limonene                                   | 98.2                             |
| 1181   | 1174   | (R)-(-)-linalool                                   | 98.6                             |
| 1198   | 1189   | (S)-(+)-linalool                                   | 1.4                              |
| 1233   | 1231   | (R)-(-)-linalyl acetate                            | 98.7                             |
| 1243   | 1237   | (S)-(+)-linalyl acetate                            | 1.3                              |
| 1399   | 1403   | (1R,9S)-(-)- <i>trans</i> - $\beta$ -caryophyllene | 1E                               |

Table S3, *Melaleuca alternifolia* EO enantiomeric composition

| I'sexp | I'slit | Compound                     | % enantiomeric composition (Australian) | % enantiomeric composition (Chinese) |
|--------|--------|------------------------------|-----------------------------------------|--------------------------------------|
| 929    | 921    | (R)-(+)- $\alpha$ -pinene    | n.r.                                    | n.r.                                 |
| 929    | 923    | (S)-(-)- $\alpha$ -pinene    | n.r.                                    | n.r.                                 |
| 952    | 944    | (R)-(+)- $\beta$ -pinene     | 67.9                                    | 5.3                                  |
| 963    | 955    | (S)-(-)- $\beta$ -pinen      | 32.1                                    | 94.7                                 |
| 1020   | 1017   | (R)-(-)-phellandrene         | 39.4                                    | 47.7                                 |
| 1024   | 1020   | (S)-(+)-phellandrene         | 60.6                                    | 52.3                                 |
| 1060   | 1056   | (S)-(-)-limonene             | 39.0                                    | 2.0                                  |
| 1077   | 1072   | (R)-(+)-limonene             | 61.0                                    | 98.0                                 |
| 1250   | 1248   | (S)-(+)-4-terpineol          | 67.2                                    | 42.2                                 |
| 1258   | 1253   | (R)-(-)-4-terpineol          | 32.8                                    | 57.8                                 |
| 1302   | 1296   | (S)-(-)- $\alpha$ -terpineol | 24.2                                    | 23.0                                 |
| 1317   | 1309   | (R)-(+)- $\alpha$ -terpineol | 75.8                                    | 77.0                                 |

Table S4. Equations of the calibration curves used to quantitate the marker compounds together with their correlation coefficient and the selected range of concentration.

| Compound                | Calibration range (mg/mL) | Calibration curve equation | Correlation values |
|-------------------------|---------------------------|----------------------------|--------------------|
| linalool                | 0.047 – 4.7               | $y = 65878209x + 12265089$ | 0.9894             |
| linalyl acetate         | 0.047 – 4.7               | $y = 71332322x + 13224402$ | 0.9896             |
| 4-terpineol             | 0.5 - 5.0                 | $y = 32642349x + 4197503$  | 0.9989             |
| $\alpha$ -terpineol     | 0.5 - 5.0                 | $y = 20059684x + 2201700$  | 0.9993             |
| (R)-(-)-linalool        | 0.047 – 4.7               | $y = 94371962x + 17161963$ | 0.9989             |
| (S)-(+)-linalool        | 0.047 – 4.7               | $y = 94648975x + 17010288$ | 0.9992             |
| (R)-(-)-linalyl acetate | 0.5 - 5.0                 | $y = 90768850x + 13321659$ | 0.9994             |
| (S)-(+)-linalyl acetate | 0.5 - 5.0                 | $y = 90026414x + 7356410$  | 0.9990             |
